# Supplementary material for: Complex interplay between moral distress and other risk factors of burnout in ICU professionals: findings from a cross-sectional survey study
Source: HighWire-hosted journal article supplement (doi:10.1136/bmjqs-2020-012239), 2021-06-29
Supplement: bmjqs-2020-012239supp001_data_supplement.pdf [file bmjqs-2020-012239supp001_data_supplement.pdf]

## Supplement A: validated instruments used in this study

|                                                                                | Measured concepts              | Number of items | Scale of item measurement                                                             | Range |
|--------------------------------------------------------------------------------|--------------------------------|-----------------|---------------------------------------------------------------------------------------|-------|
| Moral distress scale Revised version (MDS-R)                                   | Moral distress                 | 21              | 0-4 Likert scale on frequency and intensity of examples of morally distressing events | 0-336 |
| MBI-NL/Utrecht Burnout Scale for health care personnel (UBOS-C)                | Emotional exhaustion           | 8               | 0-6 Likert scale (frequency)                                                          | 0-6   |
|                                                                                | Depersonalization              | 5               | 0-6 Likert scale (frequency)                                                          | 0-6   |
|                                                                                | Personal accomplishment        | 7               | 0-6 Likert scale (frequency)                                                          | 0-6   |
| Short Big Five Inventory (BFI-XS)                                              | Agreeableness                  | 3               | 1-5 Likert scale (applicability)                                                      | 1-5   |
|                                                                                | Conscientiousness              | 3               | 1-5 Likert scale (applicability)                                                      | 1-5   |
|                                                                                | Extraversion                   | 3               | 1-5 Likert scale (applicability)                                                      | 1-5   |
|                                                                                | Neuroticism                    | 3               | 1-5 Likert scale (applicability)                                                      | 1-5   |
|                                                                                | Openness                       | 3               | 1-5 Likert scale (applicability)                                                      | 1-5   |
| Survey Work-home interaction Nijmegen (SWING)                                  | Negative work-home interaction | 3               | 0-4 Likert scale (frequency)                                                          | 0-4   |
|                                                                                | Negative home-work interaction | 3               | 0-4 Likert scale (frequency)                                                          | 0-4   |
| Culture of Care Barometer (CoCB)                                               | Organizational values          | 12              | 1-5 Likert scale (applicability)                                                      | 1-5   |
|                                                                                | Managerial support             | 11              | 1-5 Likert scale (applicability)                                                      | 1-5   |
|                                                                                | Relationships with colleagues  | 4               | 1-5 Likert scale (applicability)                                                      | 1-5   |
|                                                                                | Absence of job constraints     | 3               | 1-5 Likert scale (applicability)                                                      | 1-5   |
| Teamwork Climate Inventory (TCI) from the Safety Attitudes Questionnaire (SAQ) | Teamwork Climate               | 6               | 1-5 Likert scale (applicability)                                                      | 1-5   |

## Supplement B: Cross-study comparison of prevalence estimates, using ten different methods for estimating BOS-prevalence

| Method                                                                 | Country       | Study                    | Discipline            | Reported prevalence % | Total prevalence Nijmegen % | Prevalence physicians Nijmegen (n=53) | Prevalence nurses Nijmegen (n=194) |
|------------------------------------------------------------------------|---------------|--------------------------|-----------------------|-----------------------|-----------------------------|---------------------------------------|------------------------------------|
| <b>Pre-defined cut off values</b>                                      |               |                          |                       |                       |                             |                                       |                                    |
| Cumulative MBI > -9                                                    | France        | Embriaco et al, 2007     | Intensive care        | 46.5                  | 22.7                        | 13.2                                  | 25.8                               |
|                                                                        | France        | Poncet et al, 2007       | Intensive care        | 32.8                  |                             |                                       |                                    |
|                                                                        | Switzerland   | Merlani et al, 2011      | Intensive care        | 29                    |                             |                                       |                                    |
|                                                                        | Switzerland   | Ricoe et al, 2018        | Intensive care        | 32 / 24 <sup>b</sup>  |                             |                                       |                                    |
|                                                                        | Switzerland   | Verdon et al, 2008       | Intensive care        | 28                    |                             |                                       |                                    |
| MBI-HSS EE ≥ 27 AND/OR DP ≥ 10                                         | Denmark       | Pedersen et al, 2018     | General Practice      | 25.0                  | 11.6                        | 20.8                                  | 9.3                                |
|                                                                        | United States | Shanafelt et al, 2015    | Multiple              | 54.4                  |                             |                                       |                                    |
|                                                                        | United States | Shanafelt et al, 2012    | Multiple              | 45.4                  |                             |                                       |                                    |
|                                                                        | United States | Shanafelt et al, 2009    | Internal medicine     | 34.0                  |                             |                                       |                                    |
| MBI EE > 30 OR DEP > 12 OR > PA < 33                                   | France        | Quenot et al, 2012       | Intensive care        | 28 / 14 <sup>b</sup>  | 36.7                        | 20.8 <sup>a</sup>                     | 41.8 <sup>a</sup>                  |
| MBI-HSS EE ≥ 25, DP ≥ 10 AND PA ≤ 32                                   | Portugal      | Pereira et al, 2016      | Intensive care        | 9.0                   | 2.8                         | 3.8                                   | 2.6                                |
|                                                                        | Portugal      | Teixeira et al, 2013     | Intensive care        | 9.0                   |                             |                                       |                                    |
| MBI-HSS EE ≥ 27, DP ≥ 10 AND PA ≤ 33                                   | Denmark       | Brøndt et al, 2008       | General practice      | 2.6                   | 2.8                         | 3.8                                   | 2.6                                |
|                                                                        | Denmark       | Pedersen et al, 2013     | General practice      | 2.6                   |                             |                                       |                                    |
|                                                                        | Denmark       | Pedersen et al, 2016     | Multiple              | 4.8                   |                             |                                       |                                    |
|                                                                        | France        | Lesage et al, 2013       | Occupational medicine | 11.8                  |                             |                                       |                                    |
|                                                                        | Germany       | Pantenburg et al, 2016   | Multiple              | 10.9                  |                             |                                       |                                    |
|                                                                        | Switzerland   | Arigoni et al, 2009      | Multiple              | 6                     |                             |                                       |                                    |
|                                                                        | Switzerland   | Goehring et al, 2005     | Primary care          | 3.5                   |                             |                                       |                                    |
| UBOS-C EE ≥ 2.38, DP ≥ 1.6 (women)/DP ≥ 1.8 (men), and PA ≤ 3.7        | Netherlands   | Meynaar et al, 2016      | Intensive care        | 4.4                   | 6.6                         | 5.7                                   | 7.0                                |
| UBOS-C EE ≥ 2.5, DP ≥ 1.6 (women)/DP ≥ 1.8 (men), and PA ≤ 3.7         | Belgium       | Vandenbroeck et al, 2017 | Multiple              | 5.1                   | 2.0                         | 3.8                                   | 1.6                                |
| <b>Percentile-based cut off values</b>                                 |               |                          |                       |                       |                             |                                       |                                    |
| MBI-GS EE > top tertile AND DP > top tertile                           | UK            | Upton et al, 2012        | Multiple              | 19.8                  | 20.8                        | 18.4                                  | 21.9                               |
| MBI-HSS EE > top quartile, DP > top quartile AND PA < lowest quartile  | Spain         | Riquelme et al, 2018     | Multiple              | 7.3                   | 6.4                         | 5.7                                   | 6.7                                |
| UBOS-C EE > top quartile AND DP > top quartile OR PA < lowest quartile | Netherlands   | Twellaar et al, 2008     | General practice      | 19.5                  | 16.7                        | 15.1                                  | 17.5                               |
|                                                                        | Netherlands   | Van der Wal et al, 2016  | Anesthesia            | 19.8                  |                             |                                       |                                    |

<sup>a</sup>significantly different according to Fisher's exact test (p < .01).

<sup>b</sup> These studies reported pre- and post-intervention prevalence.

Supplement C: Scores of emotional exhaustion, depersonalisation and personal accomplishment categorized into subgroups of respondents without burnout symptoms and respondents with burnout symptoms using the estimation method of a cumulative MBI > -9

| Subdomain of burnout               | Respondents without indication for burnout symptoms (N=194) | Respondents with indication for burnout symptoms (N=57) |
|------------------------------------|-------------------------------------------------------------|---------------------------------------------------------|
| Emotional exhaustion, mean (SD)    | .94 (.52)                                                   | 2.23 (.86)                                              |
| Depersonalisation, mean (SD)       | .65 (.54)                                                   | 1.52 (.79)                                              |
| Personal accomplishment, mean (SD) | 4.57 (.65)                                                  | 3.60 (.79)                                              |
| Percentage (%) of total (N=251)    | 77.3%                                                       | 22.7%                                                   |

Supplement D: Missing data analysis

| Variable                          | Missing count | Missing percent |
|-----------------------------------|---------------|-----------------|
| Sex                               | 0             | -               |
| Age                               | 6             | 2.4%            |
| Years in current job              | 5             | 2.0%            |
| Working hours per week            | 1             | .4%             |
| Pre-school or young child at home | 0             | -               |
| Partner                           | 13            | 5.2%            |
| Profession                        | 4             | 1.6%            |
| Burnout syndrome                  |               |                 |
| Emotional exhaustion              | 0             | -               |
| Depersonalisation                 | 0             | -               |
| Personal accomplishment           | 0             | -               |
| Moral distress                    | 20            | 8.0%            |
| Personality                       |               |                 |
| Agreeableness                     | 4             | 1.6%            |
| Conscientiousness                 | 3             | 1.25            |
| Extraversion                      | 0             | -               |
| Neuroticism                       | 4             | 1.6%            |
| Openness                          | 2             | .8%             |
| Work-home balance                 |               |                 |
| Negative work-to-home spill over  | 1             | .4%             |
| Negative home-to-work spill over  | 3             | 1.2%            |
| Culture of care <sup>1</sup>      |               |                 |
| Organisational values             | 74            | 29.5%           |
| Support from supervisor           | 74            | 29.5%           |
| Relationships with colleagues     | 71            | 28.3%           |
| Absence of job constraints        | 71            | 32.7%           |
| Teamwork Climate                  | 82            | 32.7%           |

<sup>1</sup>The many missing values on 'culture of care' were due to the fact that the data were gathered three months prior to this study

Supplement E: Univariate and multivariable linear regression analysis for emotional exhaustion, depersonalization and personal accomplishment with culture included in the multivariable model

|                                                 | Emotional exhaustion       |                             | Depersonalisation          |                             | Personal accomplishment    |                             |
|-------------------------------------------------|----------------------------|-----------------------------|----------------------------|-----------------------------|----------------------------|-----------------------------|
|                                                 | N = 251                    | N = 122                     | N = 251                    | N = 122                     | N = 251                    | N = 122                     |
|                                                 | Univariate<br>β [95% CI]   | Multivariable<br>β [95% CI] | Univariate<br>β [95% CI]   | Multivariable<br>β [95% CI] | Univariate<br>β [95% CI]   | Multivariable<br>β [95% CI] |
| <b>Constant</b>                                 | -                          | <b>1.41 [.87 to 1.96]</b>   | -                          | <b>1.01 [.45 to 1.58]</b>   | -                          | <b>4.35 [3.66 to 5.04]</b>  |
| <b>Moral distress<sup>1</sup></b>               | <b>.33 [.23 to .42]</b>    | <b>.23 [.11 to .35]</b>     | <b>.23 [.15 to .32]</b>    | <b>.23 [.10 to .36]</b>     | <b>-.14 [-.24 to -.04]</b> | <b>-.09 [-.24 to .07]</b>   |
| <b>Sociodemographics</b>                        |                            |                             |                            |                             |                            |                             |
| Sex (0=male)                                    | .08 [-.15 to .31]          | -.15 [-.47 to .16]          | <b>-.22 [-.42 to -.02]</b> | -.26 [-.59 to .06]          | -.21 [-.43 to .01]         | .07 [-.33 to .46]           |
| Age <sup>1</sup>                                | -.10 [-.20 to .00]         | -.07 [-.25 to .12]          | <b>-.20 [-.28 to -.11]</b> | <b>-.31 [-.50 to -.11]</b>  | <b>-.10 [-.20 to -.00]</b> | .00 [-.23 to .24]           |
| Years of experience in current job <sup>1</sup> | -.07 [-.17 to .03]         | .00 [-.17 to .17]           | <b>-.17 [-.25 to -.08]</b> | .14 [-.04 to .31]           | -.09 [-.19 to .00]         | .08 [-.13 to .30]           |
| Working hours per week <sup>1</sup>             | -.04 [-.15 to .06]         | -.02 [-.21 to .17]          | <b>.12 [.03 to .20]</b>    | .02 [-.17 to .22]           | <b>.12 [.03 to .22]</b>    | <b>.31 [.07 to .55]</b>     |
| Pre-school or Young child at home (0=no)        | .09 [-.18 to .36]          | -.20 [-.50 to .09]          | .20 [-.03 to .44]          | -.21 [-.52 to .10]          | .13 [0.13 to .39]          | .33 [-.05 to .71]           |
| Partner (0=yes) <sup>3</sup>                    | -.15 [-.42 to .12]         | -.09 [-.19 to .38]          | -.21 [-.45 to .02]         | .10 [-.19 to .40]           | -.05 [-.32 to .22]         | -.24 [-.60 to .12]          |
| Profession (0=physician, 1=nurse)               | .07 [-.18 to .32]          | -.08 [-.49 to .33]          | <b>-.32 [-.53 to -.10]</b> | -.20 [-.63 to .23]          | <b>-.33 [-.57 to -.09]</b> | -.10 [-.63 to .42]          |
| <b>Personality</b>                              |                            |                             |                            |                             |                            |                             |
| Agreeableness <sup>1</sup>                      | <b>-.13 [-.23 to -.03]</b> | .01 [-.10 to .13]           | <b>-.14 [-.23 to -.05]</b> | -.10 [-.22 to .03]          | <b>.20 [.10 to .30]</b>    | <b>.19 [.04 to .34]</b>     |
| Conscientiousness <sup>1</sup>                  | -.05 [-.15 to .05]         | -.02 [-.14 to .11]          | <b>-.11 [-.19 to -.02]</b> | -.08 [-.21 to .05]          | <b>.18 [.08 to .28]</b>    | .11 [-.05 to .27]           |
| Extraversion <sup>1</sup>                       | <b>-.12 [-.22 to -.02]</b> | .00 [-.12 to .12]           | -.07 [-.16 to .01]         | -.06 [-.19 to .06]          | <b>.21 [.11 to .30]</b>    | .08 [-.08 to .23]           |
| Neuroticism <sup>1</sup>                        | <b>.32 [.23 to .41]</b>    | <b>.14 [.02 to .26]</b>     | .07 [-.01 to .16]          | -.01 [-.114 to .11]         | <b>-.12 [-.22 to -.02]</b> | -.05 [-.20 to .11]          |
| Openness <sup>1</sup>                           | .04 [-.06 to .14]          | -.02 [-.12 to .08]          | -.00 [-.09 to .08]         | -.02 [-.14 to .07]          | <b>.13 [.03 to .22]</b>    | <b>.16 [.03 to .29]</b>     |
| <b>Work-home balance</b>                        |                            |                             |                            |                             |                            |                             |
| Negative work-to-home spill over <sup>1</sup>   | <b>.53 [.46 to .61]</b>    | <b>.32 [.18 to .46]</b>     | <b>.30 [.22 to .38]</b>    | .09 [-.06 to .24]           | <b>-.10 [-.20 to .00]</b>  | -.10 [-.28 to .09]          |
| Negative home-to-work spill over <sup>1</sup>   | <b>.40 [.31 to .49]</b>    | .05 [-.08 to .17]           | <b>.29 [.21 to .37]</b>    | <b>.13 [.00 to .25]</b>     | <b>-.18 [-.28 to -.08]</b> | -.04 [-.20 to .11]          |
| <b>Culture</b>                                  |                            |                             |                            |                             |                            |                             |
| Organisational values                           | -.09 [-.21 to .03]         | -.09 [-.35 to .16]          | -.05 [-.15 to .05]         | .13 [-.14 to .393]          | .08 [-.03 to .20]          | -.12 [-.44 to .20]          |
| Support from supervisor                         | -.07 [-.19 to .04]         | -.06 [-.33 to .22]          | -.05 [-.15 to .05]         | -.23 [-.51 to .06]          | .07 [-.04 to .19]          | -.10 [-.45 to .25]          |
| Relationship with colleagues                    | -.07 [-.18 to .05]         | .04 [-.19 to .27]           | -.02 [-.12 to .08]         | .11 [-.13 to .34]           | .04 [-.08 to .15]          | .06 [-.23 to .35]           |
| Absence of job constraints                      | -.08 [-.20 to .04]         | -.13 [-.24 to .31]          | -.00 [-.10 to .11]         | .16 [-.06 to .37]           | .06 [-.05 to .17]          | .20 [-.06 to .47]           |
| Teamwork climate                                | -.01 [-.13 to .11]         | .07 [-.07 to .21]           | .06 [-.05 to .16]          | .13 [-.02 to .28]           | .19 [.07 to .30]           | .04 [-.14 to .22]           |
| <b>Fixed effects Dummies (0=ICU 1)</b>          |                            |                             |                            |                             |                            |                             |
| ICU 2                                           | -                          | .04 [-.24 to .31]           | -                          | .16 [-.13 to .45]           | -                          | -.01 [-.37 to .34]          |
| ICU 3                                           | -                          | .04 [-.41 to .49]           | -                          | .15 [-.31 to .62]           | -                          | .42 [-.15 to 1.00]          |
| ICU 4                                           | -                          | -.09 [-.61 to .43]          | -                          | -.04 [-.58 to .50]          | -                          | -.12 [-.78 to .54]          |
| ICU 5                                           | -                          | .08 [-.38 to .55]           | -                          | -.12 [-.61 to .37]          | -                          | .42 [-.18 to 1.01]          |
| ICU 6                                           | -                          | -.21 [-.78 to .36]          | -                          | .63 [.04 to 1.22]           | -                          | .30 [-.43 to 1.03]          |
| <b>Model R-squared<sup>2</sup></b>              |                            | <b>.51*</b>                 |                            | <b>.33*</b>                 |                            | <b>.31*</b>                 |

<sup>1</sup> Independent variable scales have been transformed into z-score scales.

<sup>2</sup> Significant results are shown in bold, \*= $p < .001$ .

## References

1. Embriaco N, Azoulay E, Barrau K, et al: High Level of Burnout in Intensivists: Prevalence and Associated Factors. *Am J Respir Crit Care Med* 2007; 175:686-692.
2. Poncet MC, Toullic P, Papazian L, et al: Burnout Syndrome in Critical Care Nursing Staff. *Am J Respir Crit Care Med* 2007; 175:698-704.
3. Merlani P, Verdon M, Businger A, et al: Burnout in ICU Caregivers: A Multicenter Study of Factors Associated to Centers. *Am J Respir Crit Care Med* 2011 184:1140-1146.
4. Ricoe B, Gigon F, Durand-Steiner E, et al: Initiative for Burnout of ICU Caregivers: Feasibility and Preliminary Results of a Psychological Support. *J Intensive Care Med* 2018, doi: 10.1177/0885066618768223
5. Verdon M, Merlani P, Perneger T, et al: Burnout in a surgical team. *Intensive Care Med* 2008; 34:152-156.
6. Pedersen AF, Ingeman ML, Vedsted P: Empathy, burn-out and the use of gut feeling: a cross-sectional survey of Danish general practitioners. *BMJ Open* 2018; 8, doi: 10.1136/bmjopen-2017-020007
7. Shanafelt TD, Boone S, Tan L, et al: Burnout and Satisfaction with Work-Life Balance Among US Physicians Relative to the General Population. *Arch Intern Med* 2012; 172:1377-1385
8. Shanafelt TD, Hasan O, Dyrbye LN, et al: Changes in Burnout and Satisfaction with Work-Life Balance in Physicians and the General US Working Population Between 2011 and 2014. *Mayo Clin Proc* 2015; 90:1600-1613.
9. Shanafelt TD, West CP, Sloan JA, et al: Career fit and burnout among academic faculty. *Arch Intern Med* 2009; 169:990-995.
10. Quenot JP, Rigaud JP, Prin S, et al: Suffering among carers working in critical care can be reduced by an intensive communication strategy on end-of-life-practices. *Intensive Care Med* 2012; 38:55-61.
11. Pereira SM, Teixeira CM, Carvalho AS, et al: Compared to Palliative Care, Working in Intensive Care More than Doubles the Chances of Burnout: Results from a Nationwide Comparative Study. *Plos One* 2016; 11, doi: 10.1371/journal.pone.0162340.
12. Teixeira CM, Ribeiro O, Fonseca AM, et al: Burnout in intensive care units – a consideration of the possible prevalence and frequency of new risk factors: a descriptive correlational multicentre study. *BMC anesthesiol* 2013; 13, doi: 10.1186/1471-2253-13-38.
13. Brøndt A, Sokolowski I, Olesen F, et al: Continuing medical education and burnout among Danish GPs. *Br J Gen Pract* 2008; 58:15-19.
14. Pedersen AF, Andersen CM, Olesen F, et al: Risk of burnout in Danish GPs and exploration of factors associated with development of burnout: a two-wave panel study. *Int J Family Med* 2013, doi: 10.1155/2013/603713
15. Pedersen AF, Sørensen JK, Bruun NH, et al: Risky alcohol use in Danish physicians: associated with alexithymia and burnout? *Drug Alcohol Depend* 2016; 160:119-126.
16. Lesage FX, Berjot S, Altintas E, et al: Burnout among occupational physicians: a threat to occupational health systems? a nationwide cross-sectional survey. *Ann Occup Hyg* 2013; 57:913-919.
17. Pantenburg B, Lupp M, König HH, et al: Burnout among young physicians and its association with physicians' wishes to leave: results of a survey in Saxony, Germany. *J Occup Med Toxicol* 2016; 11, doi:10.1186/s12995-016-0091-z
18. Arigoni F, Bovier PA, Mermillod B, et al: Prevalence of burnout among Swiss cancer clinicians, paediatricians and general practitioners: who are most at risk? *Support Care Cancer* 2009; 17:75-81.
19. Goehring C, Bouvier Gallacchi M, Künzi B, et al: Psychosocial and professional characteristics of burnout in Swiss primary care practitioners: a cross-sectional survey. *Swiss Med Wkly* 2005; 135:101-108.
20. Meynaar I, Van Saase JLCM, Feberwee T: Burnout among Dutch intensivists – a nationwide survey. *Neth J Crit Care* 2016 24:12-17.
21. Vandebroek S, Van Gerven E, De Witte H, et al: Burnout in Belgian physicians and nurses. *Occup Med* 2017; 67:546-554.
22. Upton D, Mason V, Doran B, et al: The experience of burnout across different surgical specialties in the United Kingdom: a cross-sectional survey. *Surgery* 2012; 151:493-501.

23. Riquelme I, Chacón J-I, Gándara A-V, et al: Prevalence of burnout among pain medicine physicians and its potential effect upon clinical outcomes in patients with oncologic pain or chronic pain of nononcologic origin. *Pain Med* 2018; doi: 10.1093/pm/pnx335
24. Twellaar M, Winants Y, Houkes I: How healthy are Dutch general practitioners? self-reported (mental) health among Dutch general practitioners. *Eur J Gen Pract* 2018; 14:4-9.
25. Van der Wal RAB, Bucx MJL, Hendriks JCM, et al: Psychological distress, burnout and personality traits in Dutch anaesthesiologists. *Eur J Anaesthesiol* 2016; 33:179-186.
